# Supplementary material for: Quantifying the Number of Pregnancies at Risk of Malaria in 2007: A Demographic Study
Source: PLoS Med. 2010 Jan 26;7(1):e1000221. doi: 10.1371/journal.pmed.1000221 (PMC2811150; doi:10.1371/journal.pmed.1000221)
Supplement: Table S1 — Demographic characteristics and total population at risk of P. falciparum and/or P. vivax malaria by malaria endemic country and by WHO regional office in 2007 (in millions). (0.38 MB PDF) [file pmed.1000221.s002.pdf]

**Table S1: Demographic characteristics and total population at risk of *P.falciparum* and/or *P.vivax* malaria by malaria endemic country and by WHO regional office in 2007 (in millions)**

| 2007                                  | Demographic data                   |         |                            |      |          |                                         |                                   |              |                      |                     | Total population at risk* |           |         |                   |                |
|---------------------------------------|------------------------------------|---------|----------------------------|------|----------|-----------------------------------------|-----------------------------------|--------------|----------------------|---------------------|---------------------------|-----------|---------|-------------------|----------------|
|                                       | UN National Population Estimates   |         |                            |      | TPR<br>¥ | Pregnancy<br>rate per<br>1000<br>WOCBAs | Percentage pregnancies ending in: |              |                      |                     | <i>P. falciparum</i> #    |           |         | <i>P. vivax</i> # | Any<br>species |
|                                       | Total<br>Population<br>both sexes* | WOCBAs* | Number of<br>pregnancies*† | TFR  |          |                                         | Live-births                       | Still-births | Induced<br>Abortions | Spont.<br>Abortions | Stable¶                   | Unstable¶ | Overall | Overall           | Overall        |
| Countries                             |                                    |         |                            |      |          |                                         |                                   |              |                      |                     |                           |           |         |                   |                |
| <b>AFRO</b>                           | 755                                | 178     | 35                         | 5.18 | 7.16     | 199                                     | 72.4%                             | 2.3%         | 11.9%                | 13.3%               | 600                       | 8         | 608     | 73                | 615            |
| Angola <sup>1</sup>                   | 17.02                              | 3.93    | 0.96                       | 6.43 | 8.56     | 245                                     | 75.1%                             | 2.5%         | 9.0%                 | 13.4%               | 15.41                     | 0.28      | 15.70   | 0.00              | 15.70          |
| Benin <sup>1</sup>                    | 9.03                               | 2.08    | 0.44                       | 5.42 | 7.34     | 210                                     | 73.9%                             | 2.3%         | 10.3%                | 13.5%               | 7.66                      | 0.00      | 7.66    | 0.00              | 7.66           |
| Botswana <sup>1</sup>                 | 1.88                               | 0.50    | 0.06                       | 2.90 | 4.25     | 121                                     | 68.3%                             | 1.3%         | 16.4%                | 14.0%               | 0.89                      | 0.00      | 0.89    | 0.00              | 0.89           |
| Burkina Faso <sup>1</sup>             | 14.78                              | 3.39    | 0.79                       | 6.00 | 8.12     | 232                                     | 73.9%                             | 2.0%         | 10.3%                | 13.8%               | 14.23                     | 0.00      | 14.23   | 0.00              | 14.23          |
| Burundi <sup>1</sup>                  | 8.51                               | 2.01    | 0.56                       | 6.80 | 9.66     | 276                                     | 70.4%                             | 2.5%         | 14.1%                | 13.0%               | 5.66                      | 0.00      | 5.66    | 0.00              | 5.66           |
| Cameroon <sup>1</sup>                 | 18.55                              | 4.47    | 0.73                       | 4.31 | 5.74     | 164                                     | 75.1%                             | 2.1%         | 9.0%                 | 13.8%               | 16.95                     | 0.00      | 16.95   | 0.00              | 16.95          |
| Cape Verde <sup>1</sup>               | 0.53                               | 0.14    | 0.02                       | 3.37 | 4.56     | 130                                     | 73.9%                             | 1.2%         | 10.3%                | 14.6%               | 0.00                      | 0.25      | 0.25    | 0.00              | 0.25           |
| Central African Republic <sup>1</sup> | 4.34                               | 1.03    | 0.18                       | 4.58 | 6.10     | 174                                     | 75.1%                             | 2.2%         | 9.0%                 | 13.7%               | 4.15                      | 0.00      | 4.15    | 0.00              | 4.15           |
| Chad <sup>1</sup>                     | 10.78                              | 2.41    | 0.57                       | 6.20 | 8.26     | 236                                     | 75.1%                             | 2.6%         | 9.0%                 | 13.3%               | 9.76                      | 0.16      | 9.92    | 0.00              | 9.92           |
| Comoros <sup>1</sup>                  | 0.84                               | 0.21    | 0.04                       | 4.30 | 6.11     | 174                                     | 70.4%                             | 1.9%         | 14.1%                | 13.6%               | 0.59                      | 0.00      | 0.59    | 0.64              | 0.64           |
| Congo <sup>1</sup>                    | 3.77                               | 0.91    | 0.16                       | 4.49 | 5.98     | 171                                     | 75.1%                             | 2.2%         | 9.0%                 | 13.8%               | 3.33                      | 0.00      | 3.33    | 0.00              | 3.33           |
| Dem. Rep. of the Congo <sup>1</sup>   | 62.64                              | 13.90   | 3.55                       | 6.70 | 8.92     | 255                                     | 75.1%                             | 2.6%         | 9.0%                 | 13.3%               | 57.97                     | 0.00      | 57.97   | 0.00              | 57.97          |
| Côte d'Ivoire <sup>1</sup>            | 19.26                              | 4.58    | 0.79                       | 4.46 | 6.04     | 173                                     | 73.9%                             | 2.6%         | 10.3%                | 13.2%               | 17.80                     | 0.00      | 17.80   | 0.00              | 17.80          |
| Equatorial Guinea <sup>1</sup>        | 0.51                               | 0.12    | 0.02                       | 5.36 | 7.14     | 204                                     | 75.1%                             | 2.0%         | 9.0%                 | 13.9%               | 0.51                      | 0.00      | 0.51    | 0.00              | 0.51           |
| Eritrea <sup>1</sup>                  | 4.85                               | 1.20    | 0.25                       | 5.05 | 7.17     | 205                                     | 70.4%                             | 2.0%         | 14.1%                | 13.5%               | 3.33                      | 0.95      | 4.28    | 4.80              | 4.82           |
| Ethiopia <sup>1</sup>                 | 83.10                              | 19.51   | 4.19                       | 5.29 | 7.51     | 215                                     | 70.4%                             | 2.6%         | 14.1%                | 12.9%               | 46.08                     | 1.50      | 47.59   | 49.05             | 53.13          |
| Gabon <sup>1</sup>                    | 1.33                               | 0.35    | 0.04                       | 3.06 | 4.08     | 116                                     | 75.1%                             | 1.4%         | 9.0%                 | 14.5%               | 1.33                      | 0.00      | 1.33    | 0.00              | 1.33           |
| Gambia <sup>1</sup>                   | 1.71                               | 0.40    | 0.07                       | 4.70 | 6.36     | 182                                     | 73.9%                             | 2.1%         | 10.3%                | 13.7%               | 1.51                      | 0.00      | 1.51    | 0.00              | 1.51           |
| Ghana <sup>1</sup>                    | 23.48                              | 5.84    | 0.87                       | 3.84 | 5.20     | 149                                     | 73.9%                             | 1.8%         | 10.3%                | 14.0%               | 22.21                     | 0.00      | 22.21   | 0.00              | 22.21          |
| Guinea <sup>1</sup>                   | 9.37                               | 2.14    | 0.45                       | 5.44 | 7.37     | 210                                     | 73.9%                             | 2.2%         | 10.3%                | 13.6%               | 9.23                      | 0.00      | 9.23    | 0.00              | 9.23           |
| Guinea-Bissau <sup>1</sup>            | 1.70                               | 0.37    | 0.10                       | 7.07 | 9.57     | 274                                     | 73.9%                             | 2.7%         | 10.3%                | 13.1%               | 1.42                      | 0.00      | 1.42    | 0.00              | 1.42           |
| Kenya <sup>1</sup>                    | 37.54                              | 9.14    | 1.84                       | 4.96 | 7.04     | 201                                     | 70.4%                             | 3.3%         | 14.1%                | 12.2%               | 25.62                     | 0.18      | 25.80   | 0.00              | 25.80          |
| Liberia <sup>1</sup>                  | 3.75                               | 0.84    | 0.22                       | 6.77 | 9.17     | 262                                     | 73.9%                             | 2.4%         | 10.3%                | 13.4%               | 3.43                      | 0.00      | 3.43    | 0.00              | 3.43           |
| Madagascar <sup>1</sup>               | 19.68                              | 4.63    | 0.90                       | 4.78 | 6.79     | 194                                     | 70.4%                             | 2.1%         | 14.1%                | 13.4%               | 17.28                     | 0.00      | 17.28   | 18.74             | 18.74          |
| Malawi <sup>1</sup>                   | 13.93                              | 3.11    | 0.70                       | 5.59 | 7.94     | 227                                     | 70.4%                             | 2.9%         | 14.1%                | 12.6%               | 13.45                     | 0.00      | 13.45   | 0.00              | 13.45          |
| Mali <sup>1</sup>                     | 12.34                              | 2.80    | 0.71                       | 6.52 | 8.83     | 252                                     | 73.9%                             | 1.8%         | 10.3%                | 14.0%               | 12.34                     | 0.47      | 12.34   | 0.00              | 12.34          |
| Mauritania <sup>1</sup>               | 3.12                               | 0.76    | 0.13                       | 4.37 | 5.92     | 169                                     | 73.9%                             | 2.3%         | 10.3%                | 13.5%               | 0.93                      | 0.40      | 1.33    | 0.00              | 1.33           |
| Mayotte* <sup>1</sup>                 | 0.21                               | 0.05    | 0.01                       | 5.65 | 8.02     | 229                                     | 70.4%                             | 2.3%         | 14.1%                | 13.1%               | 0.00                      | 0.21      | 0.21    | 0.00              | 0.21           |
| Mozambique <sup>1</sup>               | 21.40                              | 5.10    | 1.06                       | 5.11 | 7.26     | 207                                     | 70.4%                             | 2.3%         | 14.1%                | 13.2%               | 21.06                     | 0.00      | 21.06   | 0.00              | 21.06          |
| Namibia <sup>1</sup>                  | 2.07                               | 0.54    | 0.07                       | 3.19 | 4.67     | 133                                     | 68.3%                             | 1.3%         | 16.4%                | 14.0%               | 1.25                      | 0.38      | 1.64    | 0.00              | 1.64           |
| Niger <sup>1</sup>                    | 14.23                              | 3.04    | 0.85                       | 7.19 | 9.74     | 278                                     | 73.9%                             | 2.9%         | 10.3%                | 12.9%               | 13.19                     | 0.62      | 13.81   | 0.00              | 13.81          |
| Nigeria <sup>1</sup>                  | 148.09                             | 34.57   | 7.11                       | 5.32 | 7.20     | 206                                     | 73.9%                             | 2.3%         | 10.3%                | 13.5%               | 134.60                    | 0.00      | 134.60  | 0.00              | 134.60         |
| Rwanda <sup>1</sup>                   | 9.73                               | 2.47    | 0.59                       | 5.92 | 8.41     | 240                                     | 70.4%                             | 2.2%         | 14.1%                | 13.3%               | 5.03                      | 0.00      | 5.03    | 0.00              | 5.03           |
| Sao Tome and Principe <sup>1</sup>    | 0.16                               | 0.04    | 0.01                       | 3.85 | 5.13     | 147                                     | 75.1%                             | 1.9%         | 9.0%                 | 14.0%               | 0.13                      | 0.00      | 0.13    | 0.00              | 0.13           |
| Senegal <sup>1</sup>                  | 12.38                              | 2.96    | 0.54                       | 4.69 | 6.35     | 181                                     | 73.9%                             | 2.0%         | 10.3%                | 13.8%               | 10.82                     | 0.00      | 10.82   | 0.00              | 10.82          |
| Sierra Leone <sup>1</sup>             | 5.87                               | 1.36    | 0.34                       | 6.47 | 8.76     | 250                                     | 73.9%                             | 2.8%         | 10.3%                | 13.0%               | 5.50                      | 0.00      | 5.50    | 0.00              | 5.50           |

**Table S1: Demographic characteristics and total population at risk of *P.falciparum* and/or *P.vivax* malaria by malaria endemic country and by WHO regional office in 2007 (in millions)**

| 2007                          | Demographic data                   |            |                            |             |             |                                         |                                   |              |                      |                     | Total population at risk* |           |            |                   |                |
|-------------------------------|------------------------------------|------------|----------------------------|-------------|-------------|-----------------------------------------|-----------------------------------|--------------|----------------------|---------------------|---------------------------|-----------|------------|-------------------|----------------|
|                               | UN National Population Estimates   |            |                            |             | TPR<br>¥    | Pregnancy<br>rate per<br>1000<br>WOCBAs | Percentage pregnancies ending in: |              |                      |                     | <i>P. falciparum</i> #    |           |            | <i>P. vivax</i> # | Any<br>species |
|                               | Total<br>Population<br>both sexes* | WOCBAs*    | Number of<br>pregnancies*† | TFR         |             |                                         | Live-births                       | Still-births | Induced<br>Abortions | Spont.<br>Abortions | Stable¶                   | Unstable¶ | Overall    | Overall           | Overall        |
| South Africa <sup>1</sup>     | 48.58                              | 12.98      | 1.43                       | 2.64        | 3.86        | 110                                     | 68.3%                             | 1.2%         | 16.4%                | 14.1%               | 3.44                      | 2.95      | 6.39       | 0.00              | 6.39           |
| Swaziland <sup>1</sup>        | 1.14                               | 0.30       | 0.04                       | 3.45        | 5.05        | 144                                     | 68.3%                             | 1.5%         | 16.4%                | 13.8%               | 0.23                      | 0.00      | 0.23       | 0.00              | 0.23           |
| Tanzania <sup>1</sup>         | 40.45                              | 9.38       | 1.96                       | 5.16        | 7.33        | 209                                     | 70.4%                             | 2.1%         | 14.1%                | 13.4%               | 39.84                     | 0.00      | 39.84      | 0.00              | 39.84          |
| Togo <sup>1</sup>             | 6.59                               | 1.58       | 0.29                       | 4.80        | 6.50        | 186                                     | 73.9%                             | 2.0%         | 10.3%                | 13.8%               | 5.45                      | 0.00      | 5.45       | 0.00              | 5.45           |
| Uganda <sup>1</sup>           | 30.88                              | 6.65       | 1.74                       | 6.46        | 9.17        | 262                                     | 70.4%                             | 2.3%         | 14.1%                | 13.2%               | 27.03                     | 0.00      | 27.03      | 0.00              | 27.03          |
| Zambia <sup>1</sup>           | 11.92                              | 2.71       | 0.57                       | 5.18        | 7.36        | 210                                     | 70.4%                             | 2.2%         | 14.1%                | 13.3%               | 11.84                     | 0.00      | 11.84      | 0.00              | 11.84          |
| Zimbabwe <sup>1</sup>         | 13.35                              | 3.42       | 0.44                       | 3.19        | 4.53        | 129                                     | 70.4%                             | 1.6%         | 14.1%                | 13.9%               | 7.44                      | 0.00      | 7.44       | 0.00              | 7.44           |
| <b>EMRO</b>                   | <b>409</b>                         | <b>104</b> | <b>16</b>                  | <b>3.65</b> | <b>5.31</b> | <b>172</b>                              | <b>68.8%</b>                      | <b>2.5%</b>  | <b>15.8%</b>         | <b>12.8%</b>        | <b>90</b>                 | <b>98</b> | <b>188</b> | <b>262</b>        | <b>320</b>     |
| Afghanistan <sup>2</sup>      | 27.15                              | 5.85       | 1.73                       | 7.07        | 10.35       | 296                                     | 68.3%                             | 3.2%         | 16.4%                | 12.1%               | 4.56                      | 12.53     | 17.10      | 16.60             | 20.43          |
| Djibouti <sup>1</sup>         | 0.83                               | 0.22       | 0.03                       | 3.95        | 5.61        | 160                                     | 70.4%                             | 2.5%         | 14.1%                | 13.0%               | 0.02                      | 0.41      | 0.43       | 0.71              | 0.71           |
| Iran <sup>2</sup>             | 71.21                              | 20.69      | 1.77                       | 2.04        | 2.99        | 85                                      | 68.3%                             | 0.7%         | 16.4%                | 14.6%               | 0.15                      | 2.72      | 2.87       | 47.46             | 47.67          |
| Iraq <sup>2</sup>             | 28.99                              | 7.11       | 1.25                       | 4.26        | 6.14        | 176                                     | 69.3%                             | 1.9%         | 15.3%                | 13.5%               | 0.00                      | 0.00      | 0.00       | 9.21              | 9.21           |
| Oman <sup>2</sup>             | 2.60                               | 0.63       | 0.08                       | 3.00        | 4.33        | 124                                     | 69.3%                             | 0.7%         | 15.3%                | 14.7%               | 0.00                      | 0.00      | 0.00       | 0.04              | 0.04           |
| Pakistan <sup>2</sup>         | 163.90                             | 41.23      | 6.07                       | 3.52        | 5.15        | 147                                     | 68.3%                             | 2.9%         | 16.4%                | 12.4%               | 30.74                     | 68.30     | 99.04      | 155.73            | 155.73         |
| Saudi Arabia <sup>2</sup>     | 24.74                              | 6.00       | 0.83                       | 3.35        | 4.83        | 138                                     | 69.3%                             | 0.8%         | 15.3%                | 14.6%               | 0.72                      | 1.22      | 1.94       | 13.00             | 14.39          |
| Somalia <sup>1</sup>          | 8.70                               | 2.04       | 0.50                       | 6.04        | 8.58        | 245                                     | 70.4%                             | 3.3%         | 14.1%                | 12.2%               | 8.70                      | 0.55      | 8.70       | 8.70              | 8.70           |
| Sudan <sup>1</sup>            | 38.56                              | 9.35       | 1.62                       | 4.23        | 6.05        | 173                                     | 69.9%                             | 3.9%         | 14.7%                | 11.5%               | 28.99                     | 6.84      | 35.83      | 2.98              | 35.93          |
| Syrian Arab Rep. <sup>2</sup> | 19.93                              | 5.35       | 0.68                       | 3.08        | 4.44        | 127                                     | 69.3%                             | 0.8%         | 15.3%                | 14.6%               | 0.00                      | 0.00      | 0.00       | 5.88              | 5.88           |
| Yemen <sup>2</sup>            | 22.39                              | 5.18       | 1.17                       | 5.50        | 7.93        | 227                                     | 69.3%                             | 2.5%         | 15.3%                | 12.9%               | 15.93                     | 5.72      | 21.65      | 1.88              | 21.74          |
| <b>EURO</b>                   | <b>135</b>                         | <b>37</b>  | <b>3</b>                   | <b>2.23</b> | <b>3.24</b> | <b>91</b>                               | <b>68.9%</b>                      | <b>1.1%</b>  | <b>15.7%</b>         | <b>14.2%</b>        | <b>0</b>                  | <b>3</b>  | <b>3</b>   | <b>23</b>         | <b>23</b>      |
| Armenia <sup>6</sup>          | 3.00                               | 0.87       | 0.05                       | 1.39        | 2.00        | 57                                      | 69.3%                             | 0.8%         | 15.3%                | 14.6%               | 0.00                      | 0.00      | 0.00       | 0.35              | 0.35           |
| Azerbaijan <sup>6</sup>       | 8.47                               | 2.56       | 0.19                       | 1.82        | 2.62        | 75                                      | 69.3%                             | 0.4%         | 15.3%                | 15.0%               | 0.00                      | 0.00      | 0.00       | 0.22              | 0.22           |
| Georgia <sup>6</sup>          | 4.40                               | 1.17       | 0.07                       | 1.41        | 2.03        | 58                                      | 69.3%                             | 1.0%         | 15.3%                | 14.4%               | 0.00                      | 0.00      | 0.00       | 0.69              | 0.69           |
| Kyrgyzstan <sup>2</sup>       | 5.32                               | 1.47       | 0.15                       | 2.48        | 3.63        | 104                                     | 68.3%                             | 1.3%         | 16.4%                | 14.0%               | 0.00                      | 1.20      | 1.20       | 1.62              | 1.66           |
| Tajikistan <sup>2</sup>       | 6.74                               | 1.78       | 0.25                       | 3.35        | 4.90        | 140                                     | 68.3%                             | 1.7%         | 16.4%                | 13.6%               | 0.00                      | 2.16      | 2.16       | 4.41              | 4.87           |
| Turkey <sup>6</sup>           | 74.88                              | 20.51      | 1.81                       | 2.14        | 3.09        | 88                                      | 69.3%                             | 1.0%         | 15.3%                | 14.4%               | 0.00                      | 0.00      | 0.00       | 13.99             | 13.99          |
| Turkmenistan <sup>2</sup>     | 4.97                               | 1.42       | 0.15                       | 2.50        | 3.66        | 105                                     | 68.3%                             | 1.3%         | 16.4%                | 14.0%               | 0.00                      | 0.00      | 0.00       | 1.35              | 1.35           |
| Uzbekistan <sup>2</sup>       | 27.37                              | 0.01       | 0.79                       | 2.49        | 3.65        | 104                                     | 68.3%                             | 1.3%         | 16.4%                | 14.0%               | 0.00                      | 0.00      | 0.00       | 0.29              | 0.29           |
| <b>AMRO</b>                   | <b>530</b>                         | <b>143</b> | <b>16</b>                  | <b>2.41</b> | <b>3.81</b> | <b>124</b>                              | <b>63.2%</b>                      | <b>0.9%</b>  | <b>22.0%</b>         | <b>14.0%</b>        | <b>41</b>                 | <b>50</b> | <b>91</b>  | <b>96</b>         | <b>138</b>     |
| Argentina <sup>5</sup>        | 39.53                              | 9.95       | 1.03                       | 2.25        | 3.64        | 104                                     | 61.8%                             | 0.7%         | 23.5%                | 14.0%               | 0.00                      | 0.00      | 0.00       | 3.02              | 3.02           |
| Belize <sup>4</sup>           | 0.29                               | 0.07       | 0.01                       | 2.93        | 4.35        | 124                                     | 67.3%                             | 1.1%         | 17.5%                | 14.1%               | 0.00                      | 0.17      | 0.17       | 0.25              | 0.26           |
| Bolivia <sup>5</sup>          | 9.53                               | 2.37       | 0.38                       | 3.50        | 5.66        | 162                                     | 61.8%                             | 1.3%         | 23.5%                | 13.4%               | 0.22                      | 2.61      | 2.83       | 4.05              | 4.06           |
| Brazil <sup>5</sup>           | 191.79                             | 52.64      | 5.48                       | 2.25        | 3.64        | 104                                     | 61.8%                             | 0.8%         | 23.5%                | 13.9%               | 12.79                     | 16.69     | 29.47      | 23.07             | 34.48          |
| Colombia <sup>5</sup>         | 46.16                              | 12.71      | 1.30                       | 2.22        | 3.59        | 103                                     | 61.8%                             | 0.8%         | 23.5%                | 13.9%               | 5.26                      | 7.74      | 13.00      | 17.32             | 21.44          |

**Table S1: Demographic characteristics and total population at risk of *P.falciparum* and/or *P.vivax* malaria by malaria endemic country and by WHO regional office in 2007 (in millions)**

| 2007                            | Demographic data                   |         |                            |      |          |                                         |                                   |              |                      |                     | Total population at risk* |           |         |                   |                |
|---------------------------------|------------------------------------|---------|----------------------------|------|----------|-----------------------------------------|-----------------------------------|--------------|----------------------|---------------------|---------------------------|-----------|---------|-------------------|----------------|
|                                 | UN National Population Estimates   |         |                            |      | TPR<br>¥ | Pregnancy<br>rate per<br>1000<br>WOCBAs | Percentage pregnancies ending in: |              |                      |                     | <i>P. falciparum</i> #    |           |         | <i>P. vivax</i> # | Any<br>species |
|                                 | Total<br>Population<br>both sexes* | WOCBAs* | Number of<br>pregnancies*† | TFR  |          |                                         | Live-births                       | Still-births | Induced<br>Abortions | Spont.<br>Abortions | Stable¶                   | Unstable¶ | Overall | Overall           | Overall        |
| <b>Countries</b>                |                                    |         |                            |      |          |                                         |                                   |              |                      |                     |                           |           |         |                   |                |
| Costa Rica <sup>4</sup>         | 4.47                               | 1.21    | 0.11                       | 2.10 | 3.12     | 89                                      | 67.3%                             | 0.7%         | 17.5%                | 14.5%               | 0.00                      | 0.00      | 0.00    | 1.03              | 1.03           |
| Dominican Republic <sup>4</sup> | 9.76                               | 2.52    | 0.34                       | 2.81 | 4.67     | 133                                     | 60.2%                             | 0.9%         | 25.3%                | 13.7%               | 1.41                      | 2.83      | 4.24    | 0.00              | 4.24           |
| Ecuador <sup>5</sup>            | 13.34                              | 3.44    | 0.41                       | 2.58 | 4.17     | 119                                     | 61.8%                             | 1.0%         | 23.5%                | 13.7%               | 4.12                      | 1.65      | 5.77    | 3.73              | 5.85           |
| El Salvador <sup>4</sup>        | 6.86                               | 1.82    | 0.21                       | 2.68 | 3.98     | 114                                     | 67.3%                             | 1.1%         | 17.5%                | 14.1%               | 0.00                      | 0.00      | 0.00    | 1.10              | 1.10           |
| Guatemala <sup>4</sup>          | 13.35                              | 3.24    | 0.01                       | 3.27 | 5.29     | 151                                     | 61.8%                             | 0.8%         | 23.5%                | 13.9%               | 0.14                      | 0.00      | 0.14    | 0.20              | 0.20           |
| Guyana <sup>5</sup>             | 0.74                               | 0.18    | 0.57                       | 4.15 | 6.17     | 176                                     | 67.3%                             | 2.3%         | 17.5%                | 12.9%               | 1.02                      | 5.27      | 6.30    | 4.07              | 7.30           |
| Haiti <sup>4</sup>              | 9.60                               | 2.47    | 0.02                       | 2.33 | 3.77     | 108                                     | 61.8%                             | 1.0%         | 23.5%                | 13.7%               | 0.14                      | 0.52      | 0.66    | 0.74              | 0.74           |
| Honduras <sup>4</sup>           | 7.11                               | 1.81    | 0.42                       | 3.54 | 5.88     | 168                                     | 60.2%                             | 1.5%         | 25.3%                | 13.0%               | 8.60                      | 0.00      | 8.60    | 0.00              | 8.60           |
| Mexico <sup>4</sup>             | 106.54                             | 29.58   | 0.25                       | 3.31 | 4.92     | 141                                     | 67.3%                             | 1.3%         | 17.5%                | 13.9%               | 0.88                      | 2.63      | 3.51    | 5.46              | 6.47           |
| Nicaragua <sup>4</sup>          | 5.60                               | 1.48    | 2.78                       | 2.21 | 3.28     | 94                                      | 67.3%                             | 0.5%         | 17.5%                | 14.7%               | 0.00                      | 0.00      | 0.00    | 15.82             | 15.82          |
| Panama <sup>4</sup>             | 3.34                               | 0.88    | 0.17                       | 2.76 | 4.10     | 117                                     | 67.3%                             | 1.3%         | 17.5%                | 13.9%               | 1.57                      | 2.12      | 3.70    | 2.21              | 4.71           |
| Paraguay <sup>5</sup>           | 6.13                               | 1.55    | 0.10                       | 2.56 | 3.80     | 109                                     | 67.3%                             | 0.9%         | 17.5%                | 14.3%               | 0.90                      | 0.00      | 0.90    | 0.19              | 1.06           |
| Peru <sup>5</sup>               | 27.90                              | 7.45    | 0.22                       | 3.08 | 4.98     | 142                                     | 61.8%                             | 1.0%         | 23.5%                | 13.7%               | 0.00                      | 0.00      | 0.00    | 1.52              | 1.52           |
| Suriname <sup>5</sup>           | 0.46                               | 0.12    | 0.86                       | 2.51 | 4.06     | 116                                     | 61.8%                             | 0.9%         | 23.5%                | 13.8%               | 3.87                      | 1.70      | 5.57    | 8.14              | 8.33           |
| Venezuela <sup>5</sup>          | 27.66                              | 7.33    | 0.01                       | 2.42 | 3.92     | 112                                     | 61.8%                             | 0.9%         | 23.5%                | 13.8%               | 0.01                      | 0.05      | 0.06    | 0.04              | 0.06           |
| French Guiana <sup>5</sup>      | 0.20                               | 0.05    | 0.86                       | 2.55 | 4.13     | 118                                     | 61.8%                             | 0.8%         | 23.5%                | 13.9%               | 0.22                      | 6.24      | 6.46    | 4.29              | 7.89           |

|                                |          |        |       |      |       |     |       |      |       |       |        |        |        |         |         |
|--------------------------------|----------|--------|-------|------|-------|-----|-------|------|-------|-------|--------|--------|--------|---------|---------|
| <b>SEARO</b>                   | 1,770    | 458    | 52    | 2.62 | 3.94  | 122 | 66.3% | 1.9% | 18.5% | 13.2% | 564    | 712    | 1,276  | 1,632   | 1,639   |
| Bangladesh <sup>2</sup>        | 158.67   | 41.02  | 4.86  | 2.83 | 4.14  | 118 | 68.3% | 2.7% | 16.4% | 12.6% | 15.12  | 47.99  | 63.11  | 154.08  | 154.08  |
| Bhutan <sup>2</sup>            | 0.66     | 0.17   | 0.02  | 2.19 | 3.21  | 92  | 68.3% | 1.7% | 16.4% | 13.6% | 0.66   | 0.47   | 0.66   | 0.66    | 0.66    |
| Burma <sup>2</sup>             | 48.80    | 13.97  | 1.40  | 2.07 | 3.51  | 100 | 59.0% | 1.3% | 26.5% | 13.2% | 42.88  | 1.91   | 44.79  | 47.47   | 48.80   |
| India <sup>2</sup>             | 1,169.02 | 294.81 | 34.65 | 2.81 | 4.11  | 118 | 68.3% | 2.1% | 16.4% | 13.2% | 414.53 | 535.59 | 950.12 | 1109.03 | 1109.03 |
| Indonesia <sup>2</sup>         | 231.63   | 64.13  | 6.77  | 2.18 | 3.70  | 106 | 59.0% | 0.7% | 26.5% | 13.7% | 68.59  | 81.93  | 150.52 | 215.66  | 217.60  |
| Republic of Korea <sup>2</sup> | 48.22    | 13.10  | 0.80  | 1.21 | 2.13  | 61  | 56.8% | 1.0% | 29.0% | 13.2% | 0.00   | 0.00   | 0.00   | 12.39   | 12.39   |
| Nepal <sup>2</sup>             | 28.20    | 7.18   | 0.98  | 3.28 | 4.80  | 137 | 68.3% | 3.9% | 16.4% | 11.4% | 3.40   | 6.15   | 9.54   | 18.01   | 18.92   |
| Sri Lanka <sup>2</sup>         | 19.30    | 5.29   | 0.42  | 1.88 | 2.75  | 79  | 68.3% | 0.7% | 16.4% | 14.6% | 1.75   | 7.53   | 9.28   | 10.46   | 12.84   |
| Thailand <sup>2</sup>          | 63.88    | 17.85  | 1.60  | 1.85 | 3.14  | 90  | 59.0% | 0.6% | 26.5% | 13.9% | 16.53  | 30.53  | 47.06  | 63.88   | 63.88   |
| Timor-Leste <sup>2</sup>       | 1.16     | 0.26   | 0.08  | 6.53 | 11.07 | 316 | 59.0% | 0.8% | 26.5% | 13.7% | 0.96   | 0.00   | 0.96   | 0.63    | 0.96    |

|                               |          |        |       |      |      |     |       |      |       |       |       |       |       |        |        |
|-------------------------------|----------|--------|-------|------|------|-----|-------|------|-------|-------|-------|-------|-------|--------|--------|
| <b>WPRO</b>                   | 1,558    | 423    | 40    | 1.88 | 3.27 | 139 | 57.3% | 1.3% | 28.4% | 13.0% | 91    | 113   | 203   | 1,090  | 1,131  |
| Cambodia <sup>2</sup>         | 14.44    | 3.87   | 0.60  | 3.18 | 5.39 | 154 | 59.0% | 1.2% | 26.5% | 13.2% | 10.77 | 2.55  | 13.33 | 12.65  | 14.44  |
| China <sup>2</sup>            | 1,328.63 | 361.61 | 31.48 | 1.73 | 3.05 | 87  | 56.8% | 1.4% | 29.0% | 12.9% | 17.13 | 20.32 | 37.45 | 896.81 | 915.87 |
| Lao <sup>2</sup>              | 5.86     | 1.52   | 0.24  | 3.21 | 5.44 | 155 | 59.0% | 1.2% | 26.5% | 13.2% | 5.30  | 0.01  | 5.31  | 2.32   | 5.32   |
| Malaysia <sup>2</sup>         | 26.57    | 7.06   | 0.89  | 2.60 | 4.41 | 126 | 59.0% | 0.5% | 26.5% | 14.0% | 6.29  | 16.17 | 22.46 | 10.15  | 22.66  |
| Papua New Guinea <sup>3</sup> | 6.33     | 1.60   | 0.25  | 3.78 | 5.45 | 156 | 69.3% | 1.2% | 15.3% | 14.2% | 4.11  | 0.00  | 4.11  | 3.90   | 4.46   |
| Philippines <sup>2</sup>      | 87.96    | 22.52  | 3.52  | 3.23 | 5.47 | 156 | 59.0% | 0.7% | 26.5% | 13.7% | 26.95 | 20.41 | 47.35 | 78.55  | 82.01  |

**Table S1: Demographic characteristics and total population at risk of *P.falciparum* and/or *P.vivax* malaria by malaria endemic country and by WHO regional office in 2007 (in millions)**

| 2007                         | Demographic data                   |              |                            |             |             |                                         |                                   |              |                      |                     | Total population at risk* |            |              |                   |                |
|------------------------------|------------------------------------|--------------|----------------------------|-------------|-------------|-----------------------------------------|-----------------------------------|--------------|----------------------|---------------------|---------------------------|------------|--------------|-------------------|----------------|
|                              | UN National Population Estimates   |              |                            |             | TPR<br>¥    | Pregnancy<br>rate per<br>1000<br>WOCBAs | Percentage pregnancies ending in: |              |                      |                     | <i>P. falciparum</i> #    |            |              | <i>P. vivax</i> # | Any<br>species |
|                              | Total<br>Population<br>both sexes* | WOCBAs*      | Number of<br>pregnancies*† | TFR         |             |                                         | Live-births                       | Still-births | Induced<br>Abortions | Spont.<br>Abortions | Stable¶                   | Unstable¶  | Overall      | Overall           | Overall        |
| Countries                    |                                    |              |                            |             |             |                                         |                                   |              |                      |                     |                           |            |              |                   |                |
| Solomon Islands <sup>3</sup> | 0.50                               | 0.12         | 0.02                       | 3.87        | 5.58        | 159                                     | 69.3%                             | 0.9%         | 15.3%                | 14.4%               | 0.43                      | 0.00       | 0.43         | 0.38              | 0.49           |
| Vanuatu <sup>3</sup>         | 0.23                               | 0.06         | 0.01                       | 3.74        | 5.39        | 154                                     | 69.3%                             | 1.0%         | 15.3%                | 14.4%               | 0.22                      | 0.00       | 0.22         | 0.20              | 0.22           |
| Viet Nam <sup>2</sup>        | 87.38                              | 24.82        | 2.57                       | 2.14        | 3.63        | 104                                     | 59.0%                             | 0.7%         | 26.5%                | 13.8%               | 19.31                     | 53.31      | 72.62        | 85.08             | 85.49          |
| <b>TOTAL</b>                 | <b>5,157</b>                       | <b>1,343</b> | <b>162</b>                 | <b>2.77</b> | <b>4.23</b> | <b>159</b>                              | <b>65.5%</b>                      | <b>1.8%</b>  | <b>19.5%</b>         | <b>13.3%</b>        | <b>1,386</b>              | <b>985</b> | <b>2,369</b> | <b>3,177</b>      | <b>3,868</b>   |

\* In millions

† The total number of pregnancies is the sum of the number of live-births, stillbirths, miscarriages and induced abortions.

¥ TPR is the total number of pregnancies during the period of child-bearing age of a women (15 to 49 years of age).

# Includes countries where *P. falciparum* and *P. vivax* co-exist

¶ Stable transmission:  $\geq 0.1$  autochthonous *P. falciparum* cases per 1,000 people per annum; unstable transmission  $< 0.1$  autochthonous *P. falciparum* cases per 1,000 people per annum

Abbreviation: TFR: Total Fertility Rate; TPR: Total Pregnancy Rate; UN: United Nations; WOCBA: Women of Childbearing Age (15-49 years of age); PWAR: Pregnant Women at Risk

**Note:** The regional and total estimates for TFR, Stillbirth rate, TPR and pregnancy rates are weighted means. The regional and total numbers at risk was derived directly as the sum of the national estimates within each region and globally.

**Continents:** The number in superscript after each country's name refers to the continent to which the country belongs: 1 = Africa; 2=Asia; 3=Oceania; 4=North America; 5=South America; 6=Europe
